# Supplementary material for: Nanoparticles of Rh confined and tailored by LaFeO3–La2O3 on SiO2 for direct ethanol synthesis from syngas
Source: Royal Society of Chemistry journal article supplement (doi:10.1039/c9cy00416e), 2019-01-01
Supplement: c9cy00416e1.pdf [file c9cy00416e1.pdf]

## Nanoparticles of Rh confined and tailored by LaFeO<sub>3</sub>-La<sub>2</sub>O<sub>3</sub> on SiO<sub>2</sub> for direct ethanol synthesis from syngas

Huixian Zhong,<sup>a,b</sup> Jiaming Wang,<sup>a,b</sup> Kang An,<sup>a,b</sup> Kegong Fang,<sup>\*c</sup> Yuan Liu <sup>\*a,b</sup>

a. Tianjin Key Laboratory of Applied Catalysis Science and Technology, School of Chemical Engineering, Tianjin University, Tianjin 300072, China

b. Collaborative Innovation Center of Chemical Science and Engineering (Tianjin), Tianjin 300072, China

c. State Key Laboratory of Coal Conversion, Institute of Coal Chemistry, Chinese Academy of Sciences

\*Corresponding author: Email address: yuanliu@tju.edu.cn (Y. Liu) kgfang@sxicc.ac.cn (K. G. Fang)

**Fig. S1** Nitrogen adsorption and desorption isotherm curves (a) and BJH pore size distributions (b) of SiO<sub>2</sub> and LaFe<sub>1-x</sub>Rh<sub>x</sub>O<sub>3</sub>/SiO<sub>2</sub> catalysts (x = 0.2 - 0.6, 1).

**Table S1** Physical properties of SiO<sub>2</sub> and LaFe<sub>1-x</sub>Rh<sub>x</sub>O<sub>3</sub>/SiO<sub>2</sub> catalysts (x = 0.2 - 0.6, 1).

**Fig. S2** The EDS mapping images for LaFe<sub>0.5</sub>Rh<sub>0.5</sub>O<sub>3</sub>/SiO<sub>2</sub> after reduction.

**Fig. S3** XPS spectra (dotted lines) and the corresponding peak simulating (solid lines) of La 3d, Fe 2p and Rh 3d for LaFe<sub>0.5</sub>Rh<sub>0.5</sub>O<sub>3</sub>/SiO<sub>2</sub> after reduction (a), reaction (b) and stability test (c).

**Fig. S4** Catalytic performance for LaFe<sub>0.9</sub>Rh<sub>0.1</sub>O<sub>3</sub>/SiO<sub>2</sub> catalysts with different rhodium content for DES from syngas.

**Fig. S5** Catalytic performance for LaRhO<sub>3</sub>/SiO<sub>2</sub> catalyst for DES from syngas.

**Table S2** Catalytic performance of CO hydrogenation over LaFe<sub>1-x</sub>Rh<sub>x</sub>O<sub>3</sub>/SiO<sub>2</sub> catalysts at 240 °C and LaRhO<sub>3</sub>/SiO<sub>2</sub> catalyst at 280 °C.

**Table S3** Apparent kinetic parameters of ethanol over LaFe<sub>1-x</sub>Rh<sub>x</sub>O<sub>3</sub>/SiO<sub>2</sub> catalysts (x = 0.2 - 0.6, 1) at 230 - 245 °C and 3 MPa.

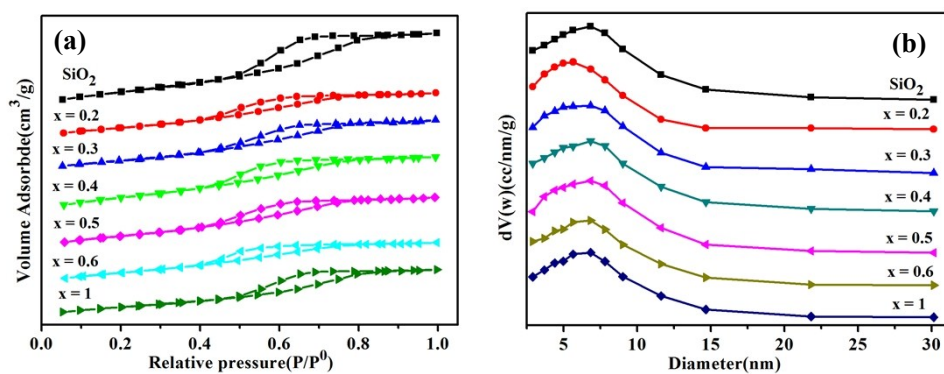

**Fig. S1.** Nitrogen adsorption and desorption isotherm curves (a) and BJH pore size distributions (b) of SiO<sub>2</sub> and LaFe<sub>1-x</sub>Rh<sub>x</sub>O<sub>3</sub>/SiO<sub>2</sub> catalysts (x = 0.2 - 0.6, 1).

**Table S1.** Physical properties of SiO<sub>2</sub> and LaFe<sub>1-x</sub>Rh<sub>x</sub>O<sub>3</sub>/SiO<sub>2</sub> catalysts (x = 0.2 - 0.6, 1)

| Sample           | S <sub>BET</sub> (m <sup>2</sup> ·g <sup>-1</sup> ) | Pore size (nm) | V <sub>BJH</sub> (cm <sup>3</sup> ·g <sup>-1</sup> ) |
|------------------|-----------------------------------------------------|----------------|------------------------------------------------------|
| SiO <sub>2</sub> | 481                                                 | 6.9            | 0.66                                                 |
| x = 0.2          | 410                                                 | 5.3            | 0.38                                                 |
| x = 0.3          | 429                                                 | 5.6            | 0.4                                                  |
| x = 0.4          | 435                                                 | 5.8            | 0.44                                                 |
| x = 0.5          | 444                                                 | 6.0            | 0.48                                                 |
| x = 0.6          | 450                                                 | 6.3            | 0.53                                                 |
| x = 1            | 461                                                 | 6.5            | 0.57                                                 |

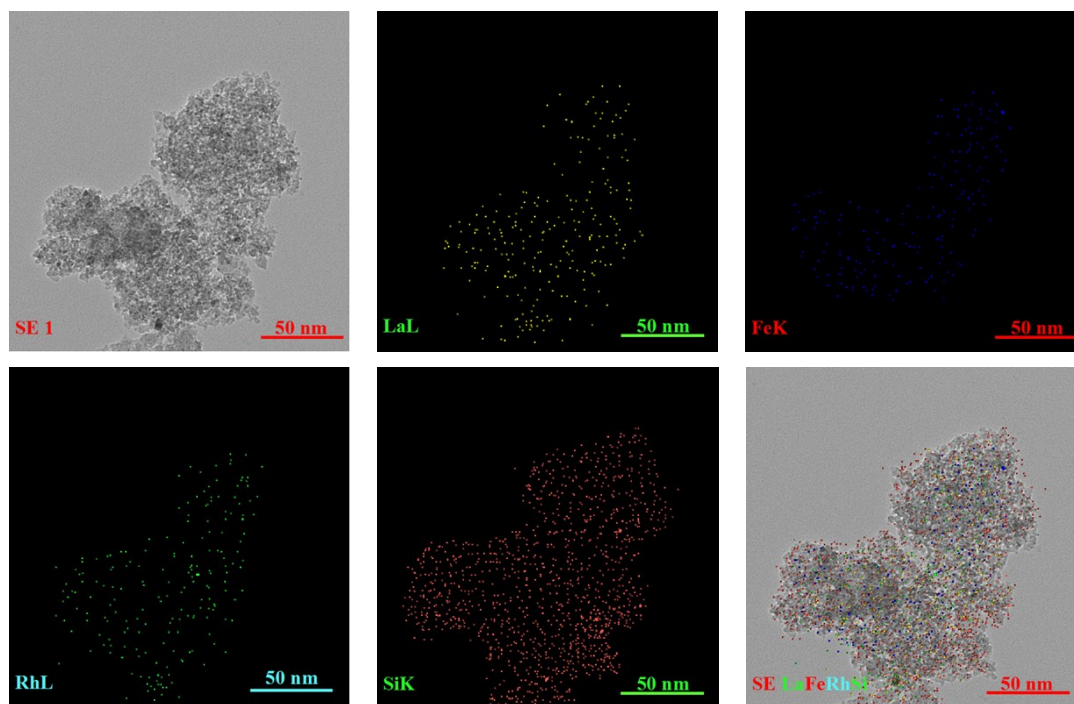

**Fig. S2** The EDS mapping images for  $\text{LaFe}_{0.5}\text{Rh}_{0.5}\text{O}_3/\text{SiO}_2$  after reduction.

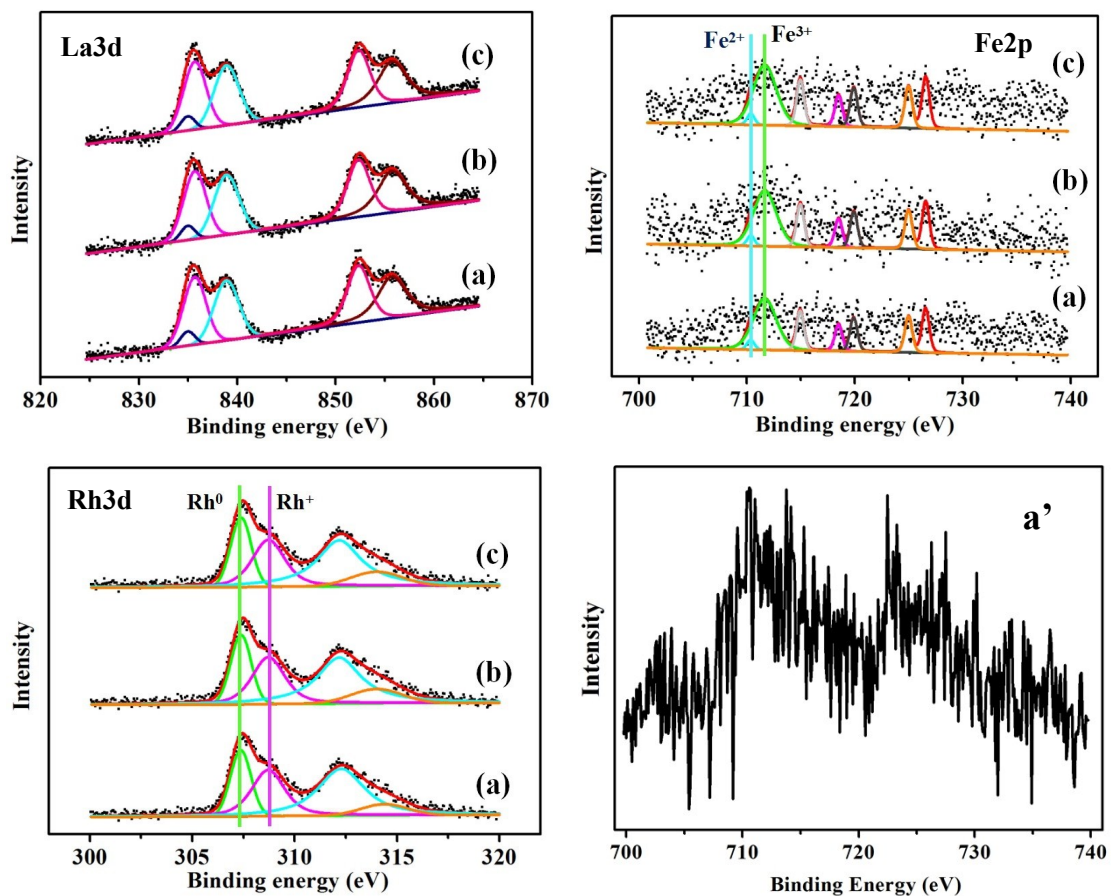

**Fig. S3.** XPS spectra and the corresponding peak simulating of La 3d, Fe 2p and Rh 3d for LaFe<sub>0.5</sub>Rh<sub>0.5</sub>O<sub>3</sub>/SiO<sub>2</sub> after reduction (a), reaction (b) and stability test (c). The enlarge of XPS survey spectrum of Fe 2p for LaFe<sub>0.5</sub>Rh<sub>0.5</sub>O<sub>3</sub>/SiO<sub>2</sub> after reduction (a').

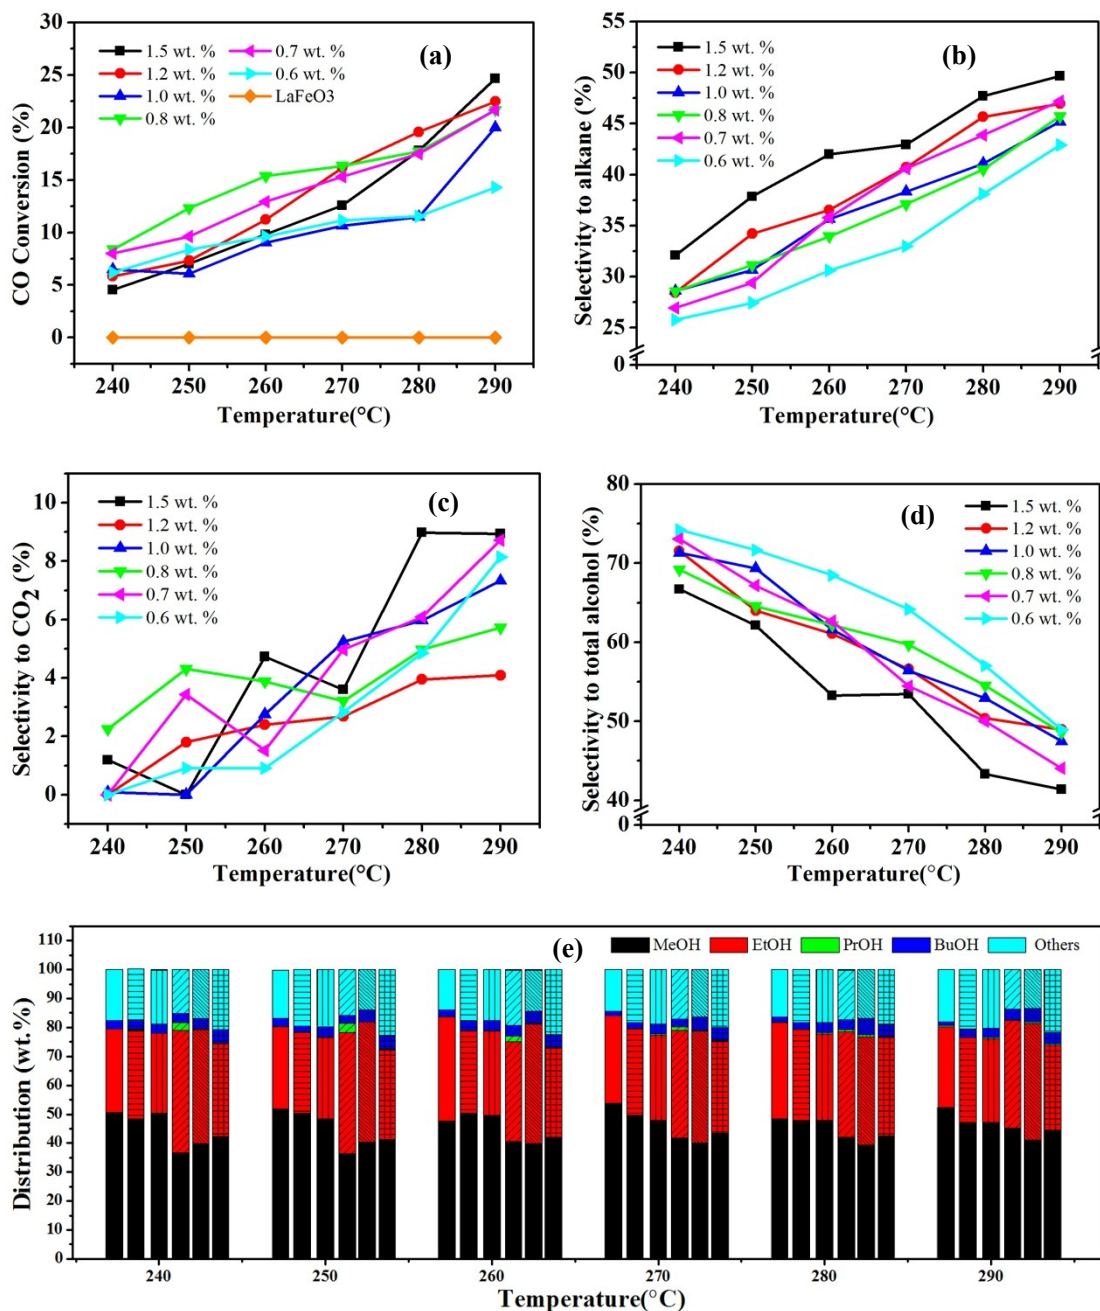

**Fig. S4.** The conversions of CO (a) and selectivities toward hydrocarbons (b),  $\text{CO}_2$  (c) and alcohols (d) vs. reaction temperature over  $y\text{Rh-LaFe}_{0.9}\text{Rh}_{0.1}\text{O}_3/\text{SiO}_2$  catalysts ( $y$  stands for weight ratio of rhodium in  $\text{LaFe}_{0.9}\text{Rh}_{0.1}\text{O}_3/\text{SiO}_2$ ,  $y = 1.5$  wt. %,  $1.2$  wt. %,  $1.0$  wt. %,  $0.8$  wt. %,  $0.7$  wt. % and  $0.6$  wt. %) and ( $\blacklozenge$ ) 20 wt. %  $\text{LaFeO}_3/\text{SiO}_2$ . ( $\blacksquare$ )  $y = 1.5$  wt. %, ( $\bullet$ )  $y = 1.2$  wt. %, ( $\blacktriangle$ )  $y = 1.0$  wt. %, ( $\blacktriangledown$ )  $y = 0.8$  wt. %, ( $\blacklozenge$ )  $y = 0.7$  wt. % and ( $\blacktriangleright$ )  $y = 0.6$  wt. % at a GHSV of  $3900 \text{ mL (g}_{\text{cat}} \text{ h)}^{-1}$  in the syngas mixture of  $\text{H}_2/\text{CO}/\text{N}_2 = 8/4/1$  and at 3 MPa. The alcohol distributions (e) over  $y\text{Rh-LaFe}_{0.9}\text{Rh}_{0.1}\text{O}_3/\text{SiO}_2$  catalysts, ( $\square$ )  $y = 1.5$  wt. %, ( $\equiv$ )  $y = 1.2$  wt. %, ( $\parallel$ )  $y = 1.0$  wt. %, ( $\text{▨}$ )  $y = 0.8$  wt. %, ( $\text{▩}$ )  $y = 0.7$  wt. % and ( $\text{▧}$ )  $y = 0.6$  wt. %.

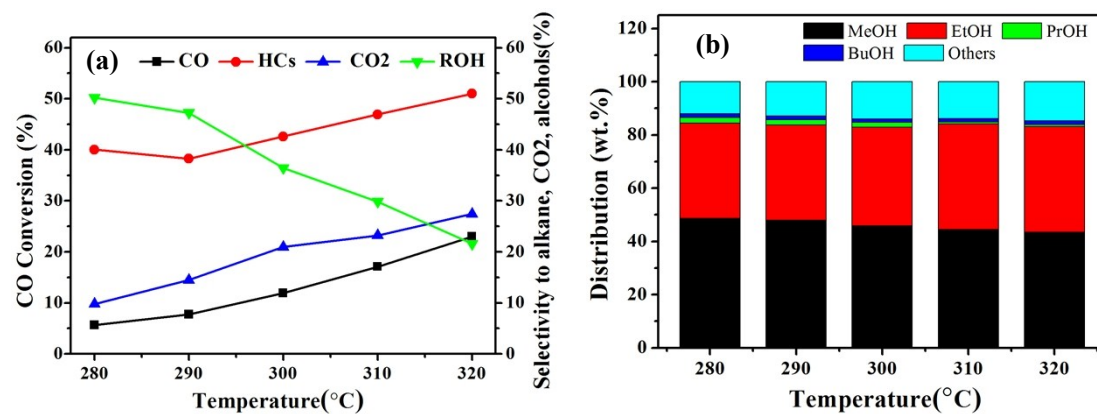

**Fig. S5.** The conversions of CO and selectivities toward hydrocarbons, CO<sub>2</sub>, alcohols (a) and alcohol distributions (b) vs. reaction temperature over LaRhO<sub>3</sub>/SiO<sub>2</sub> catalyst at a GHSV of 3900 mL (g<sub>cat</sub> h)<sup>-1</sup> in the syngas mixture of H<sub>2</sub>/CO/N<sub>2</sub> = 8/4/1 and at 3 MPa.

**Table S2.** Catalytic performance of CO hydrogenation over LaFe<sub>1-x</sub>Rh<sub>x</sub>O<sub>3</sub>/SiO<sub>2</sub> catalysts at 240 °C and LaRhO<sub>3</sub>/SiO<sub>2</sub> catalyst at 280 °C.

| Catalysts <sup>c</sup> | Selectivity to hydrocarbons (%) <sup>b</sup> |      |      |      | Selectivity to alcohols (%) <sup>b</sup> |      |     |     |
|------------------------|----------------------------------------------|------|------|------|------------------------------------------|------|-----|-----|
|                        | C1                                           | C2   | C3   | C4+  | C1                                       | C2   | C3  | C4+ |
| x = 0 <sup>a</sup>     | 34.95                                        | 0.94 | 2.17 | 1.98 | 48.7                                     | 35.8 | 2.0 | 1.4 |
| x = 0.2                | 26.26                                        | 1.15 | 1.54 | 1.74 | 41.7                                     | 40.2 | 0.2 | 1.6 |
| x = 0.3                | 25.47                                        | 1.20 | 1.61 | 1.63 | 37.1                                     | 43.8 | 1.5 | 1.9 |
| x = 0.4                | 24.02                                        | 1.10 | 1.47 | 1.91 | 34.8                                     | 47.5 | 0.7 | 2.0 |
| x = 0.5                | 20.96                                        | 1.20 | 1.61 | 1.80 | 30.8                                     | 51.2 | 1.9 | 1.7 |
| x = 0.6                | 21.84                                        | 1.30 | 1.75 | 2.09 | 41.3                                     | 40.5 | 0.9 | 3.2 |

Reaction conditions: 240 °C, GHSV = 3900 mL (g<sub>cat</sub> h)<sup>-1</sup>, H<sub>2</sub>/CO/N<sub>2</sub> = 8/4/1, 3 MPa.

<sup>a</sup> the reaction temperature for reduced LaRhO<sub>3</sub>/SiO<sub>2</sub> catalyst was 280 °C.

<sup>b</sup> Selectivity =  $n_i M_i / \sum n_i M_i$ . Where  $n_i$  was the number of carbon atoms in product i (hydrocarbons, alcohols);  $M_i$  was the mole percent of product i measured.

**Table S3.** Apparent kinetic parameters<sup>a,b,c,d</sup> of ethanol on LaFe<sub>1-x</sub>Rh<sub>x</sub>O<sub>3</sub>/SiO<sub>2</sub> catalysts (x = 0.2 - 0.6, 1) at 230 - 245 °C and 3 MPa.

| catalysts               | x = 0.2 | x = 0.3 | x = 0.4 | x = 0.5 | x = 0.6 | x = 1 |
|-------------------------|---------|---------|---------|---------|---------|-------|
| E <sub>a</sub> (kJ/mol) | 85.0    | 87.1    | 88.2    | 88.1    | 79.1    | 77.1  |

<sup>a</sup> The reaction orders of CO and H<sub>2</sub> were determined by fitting a power-law rate expression as equation  $r_i = k \cdot p_{CO}^x \cdot p_{H_2}^y$ .

<sup>b</sup> Apparent activation energies (E<sub>a</sub>) of products were determined by Arrhenius equation as equation  $k = k_0 \cdot e^{-\frac{E_a}{RT}}$ .

<sup>c</sup> CO conversion was kept less than 10% to assure differential condition.

<sup>d</sup> accuracy was ± 10%
